# Supplementary figures and images for: Synthesis of polysubstituted quinolines through promoter-regulated selective annulation and C–C bond cleavage from 2-styrylanilines and β-keto esters
Source: Royal Society of Chemistry journal article supplement (doi:10.1039/d0qo00709a), 2020-01-01

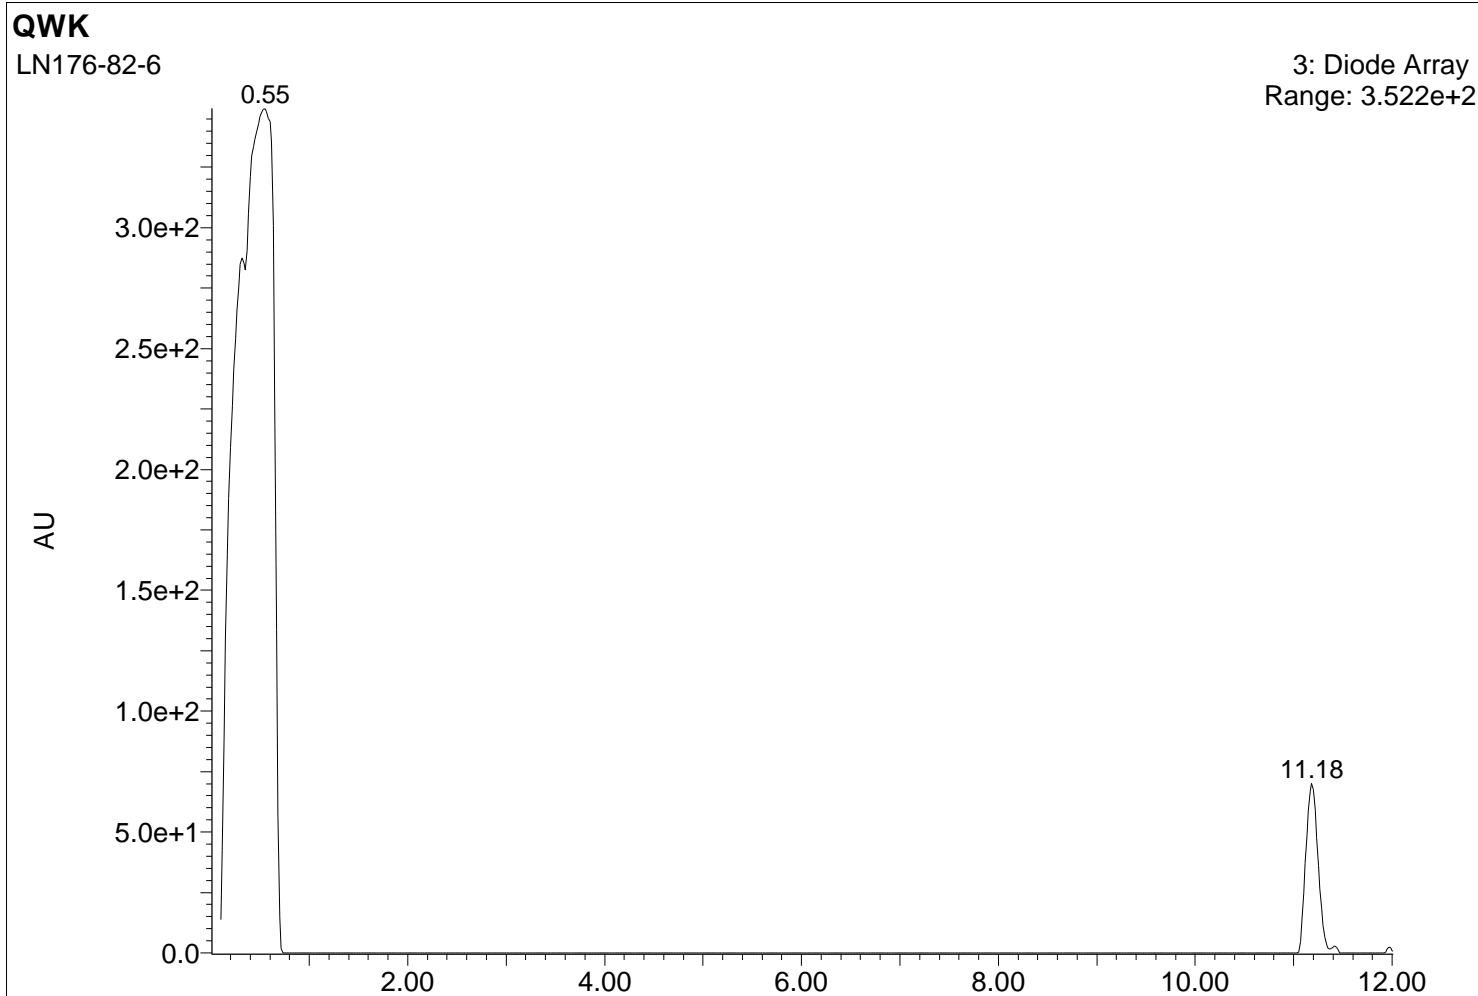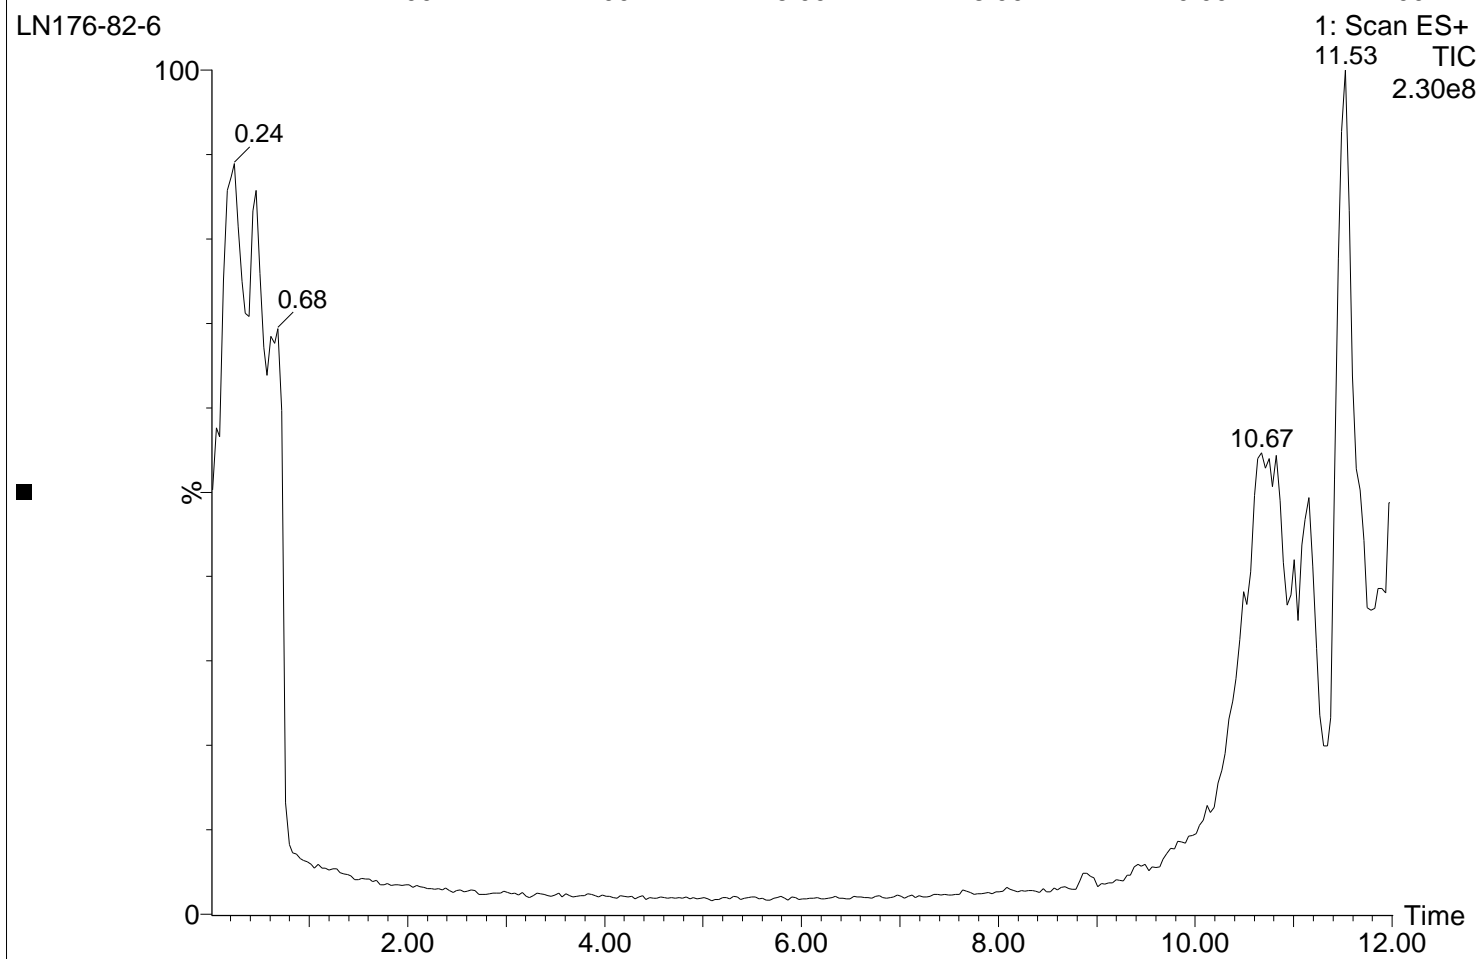

**QWK**

LN176-82-6 302 (11.155)

1: Scan ES+  
2.70e7

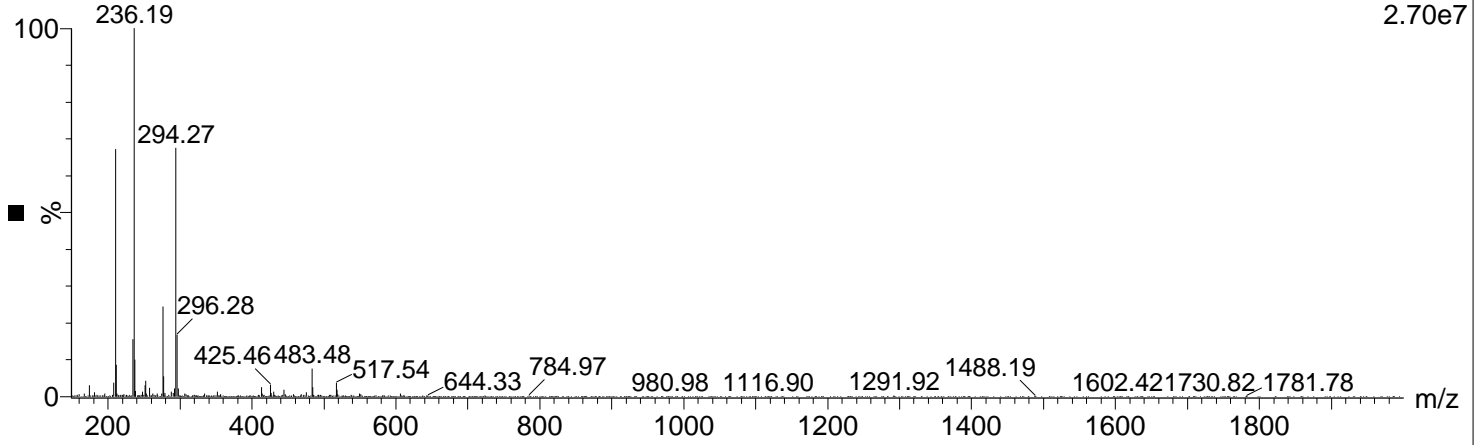

LN176-82-6 312 (11.525)

1: Scan ES+  
5.41e7

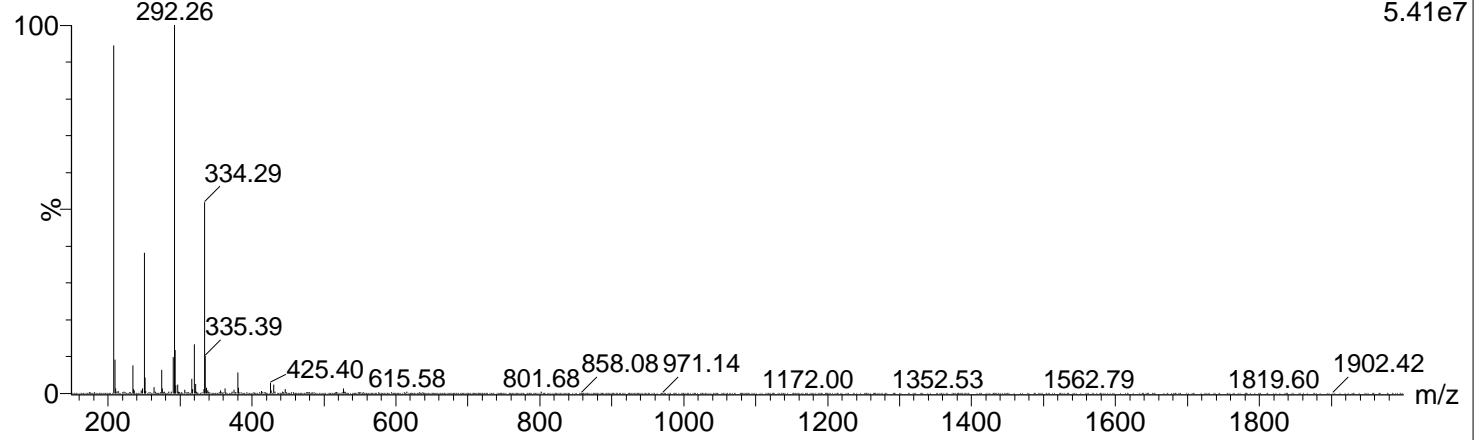

LN176-82-6 289 (10.674)

1: Scan ES+  
7.44e7

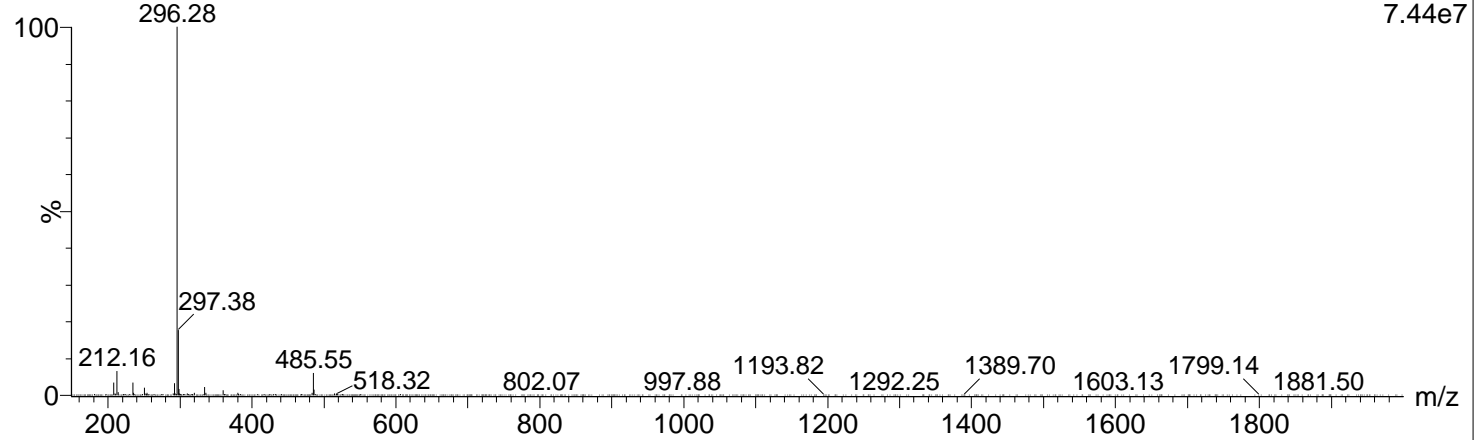

LN176-82-6 12 (0.425)

1: Scan ES+  
8.13e7

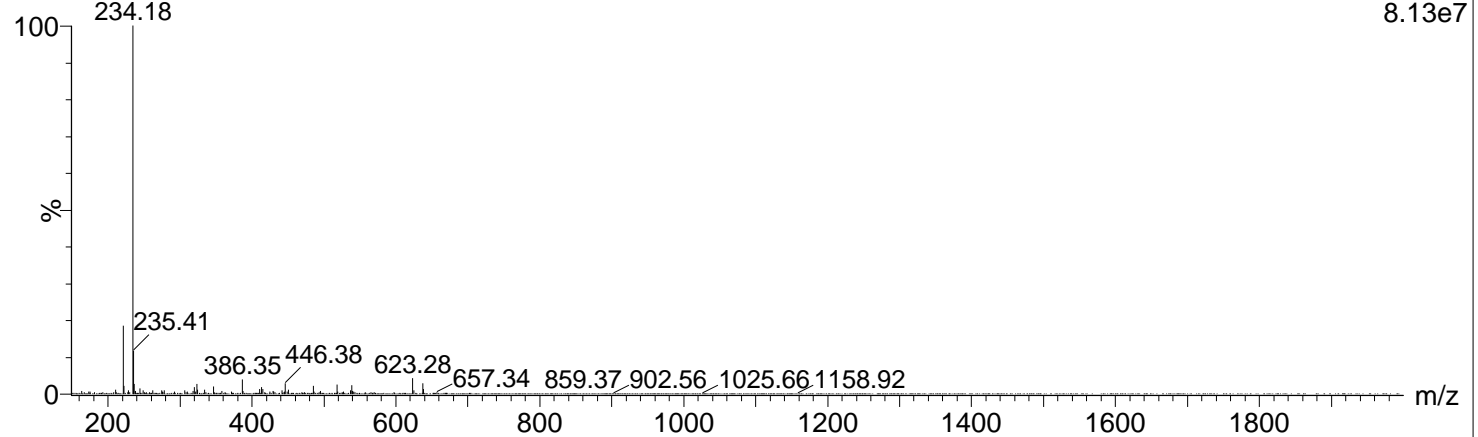

Supplement: d0qo00709a2.pdf [file d0qo00709a2.pdf]
